# Supplementary material
Source: PubMed Central journal article supplement (PMC3141957)
Supplement: 1102664108_Appendix.pdf [file 1102664108_Appendix.pdf]

## SUPPORTING INFORMATION

### Site-specific characterization of threonine, serine and tyrosine glycosylations of amyloid precursor protein/amyloid $\beta$ -peptides in human cerebrospinal fluid

Adnan Halim, Gunnar Brinkmalm, Ulla Rüetschi, Ann Westman-Brinkmalm, Erik Portelius, Henrik Zetterberg, Kaj Blennow, Göran Larson\* and Jonas Nilsson\*

goran.larson@clinchem.gu.se

jonas.nilsson@clinchem.gu.se

#### Content

Fig. S1-S10

Table S1 and S2

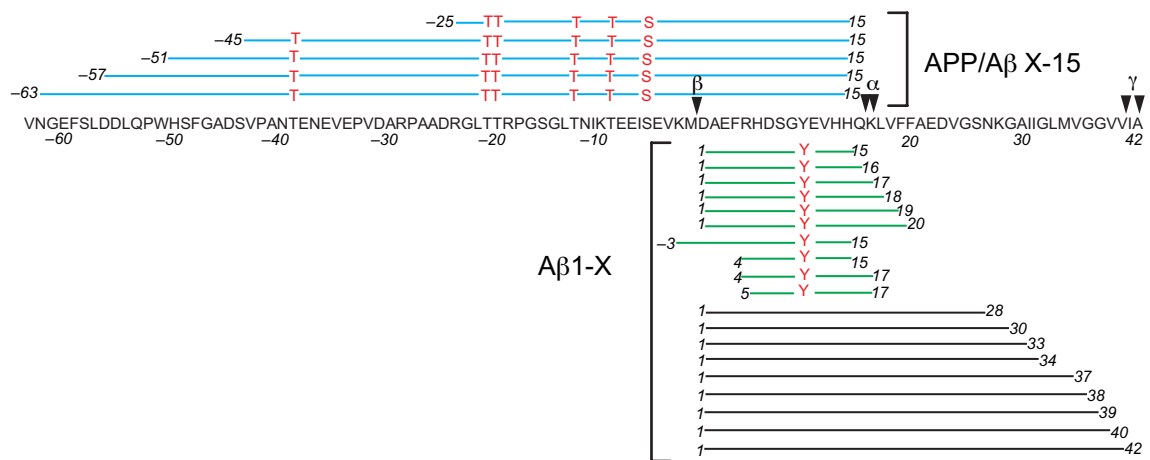

**Fig. S1. Amyloid Precursor Protein (APP) amino acid sequence containing the Aβ1-X and APP/AβX-15 glycopeptides identified in human CSF.** The positions of the α-, β- and γ-secretase cleavage sites are shown as arrowheads above the APP amino acid sequence. The APP/AβX-15 glycopeptides, all ending at Asn15, are shown above the sequence (blue series). The Aβ1-X glycopeptides are shown below the sequence (green series). The glycosylation sites presented in this study are indicated as red S/T/Y residues. Longer Aβ1-X peptides could not be detected in glycosylated form (black series).

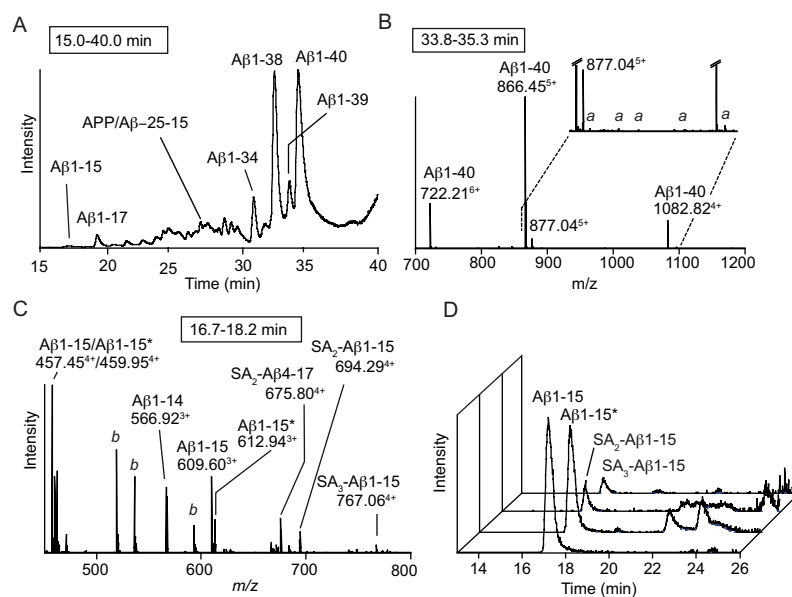

**Fig. S2. Immunopurified A $\beta$  peptides and glycopeptides in human CSF. (A)**

Total-ion current chromatogram at 15.0-40.0 min of immunopurified A $\beta$  peptides and glycopeptides. **(B)** Combined full mass spectra at 33.8-35.3 min showing A $\beta$ 1-40 and an apparent lack of A $\beta$ 1-40 glycopeptides. **(C)** Combined full mass spectra at 16.7-18.2 min showing A $\beta$ 1-15, SA<sub>2</sub>-A $\beta$ 1-15 and SA<sub>3</sub>-A $\beta$ 1-15, as well as additional A $\beta$  peptides and glycopeptides. Minor ions<sup>(a)</sup> and singly charged ions<sup>(b)</sup> are of unknown origin. **(D)** Extracted ion chromatograms for the  $m/z$  values corresponding to  $[M + 4H]^{4+}$  of the A $\beta$ 1-15 peptide, A $\beta$ 1-15-Arg-<sup>13</sup>C<sup>15</sup>N standard (A $\beta$ 1-15\*), SA<sub>2</sub>-A $\beta$ 1-15, and SA<sub>3</sub>-A $\beta$ 1-15. Parent ions are in the  $[M + zH]^{z+}$  form and charges are shown in superscript when  $z > 1$ .

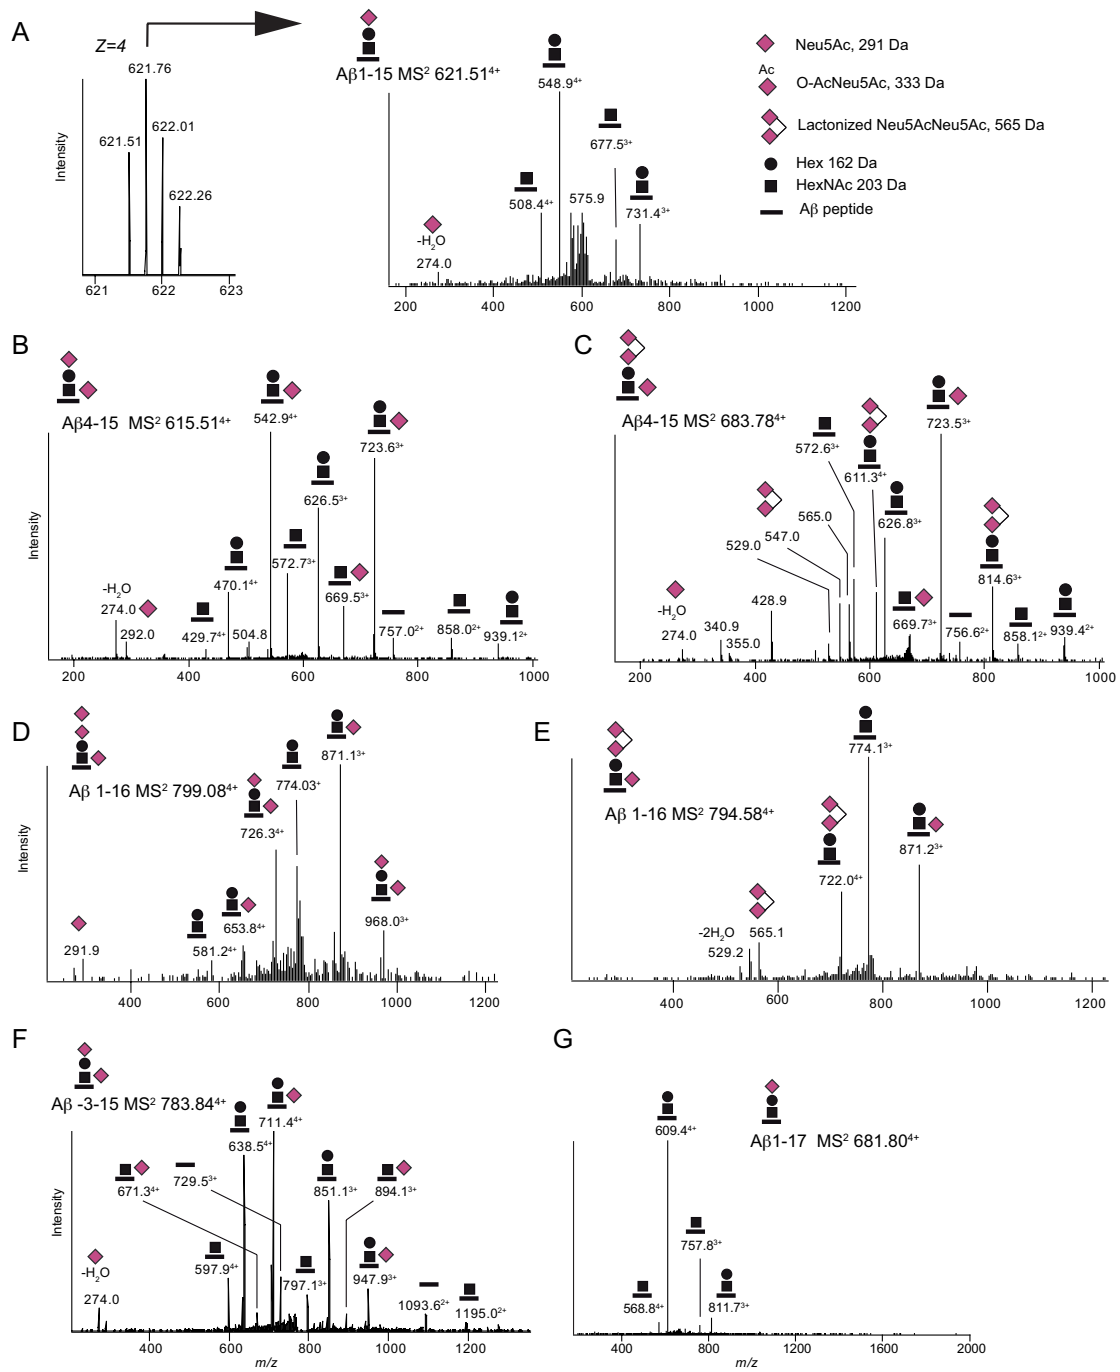

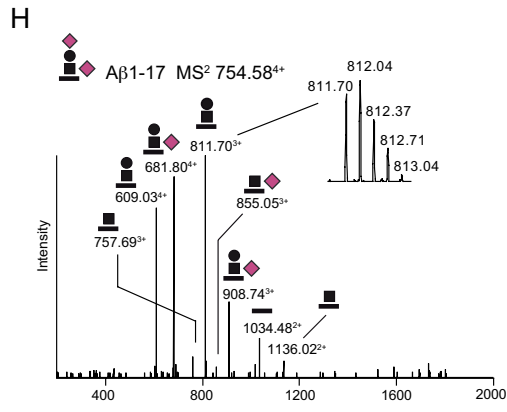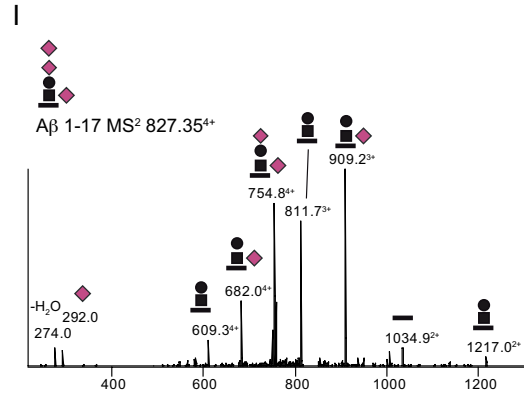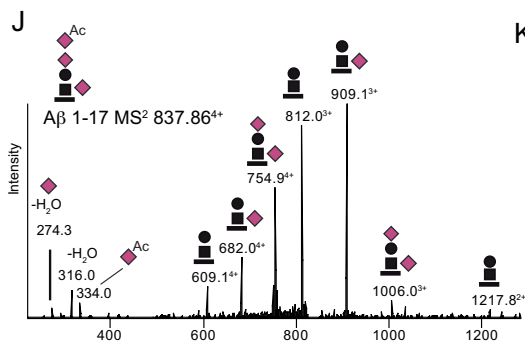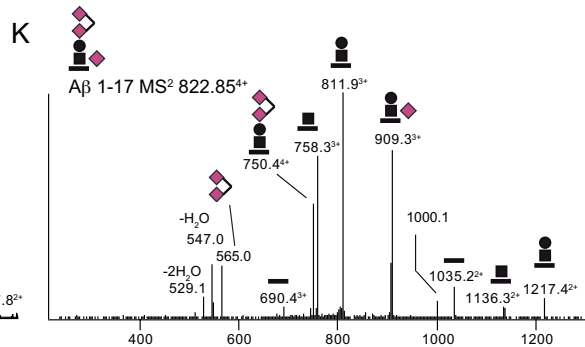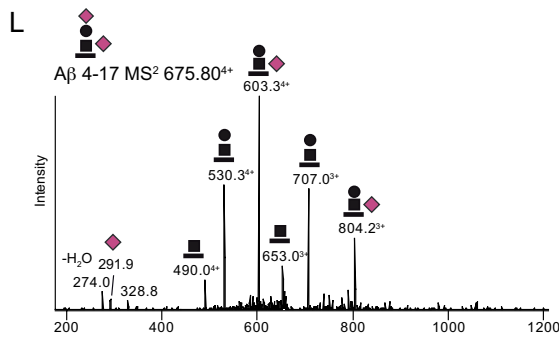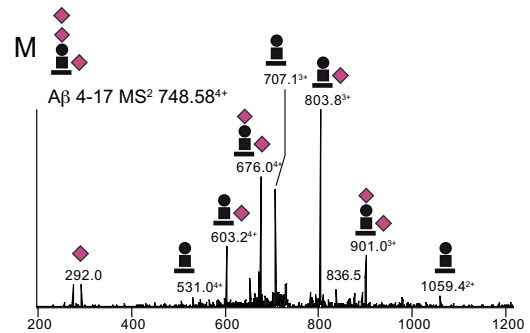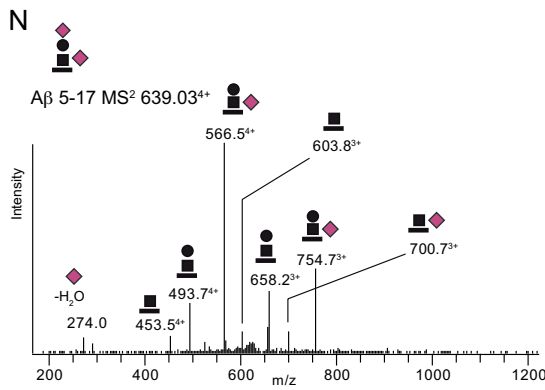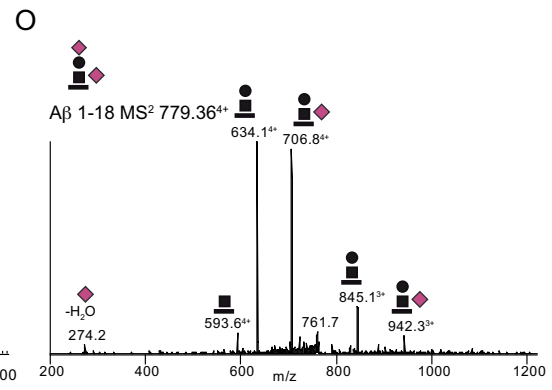

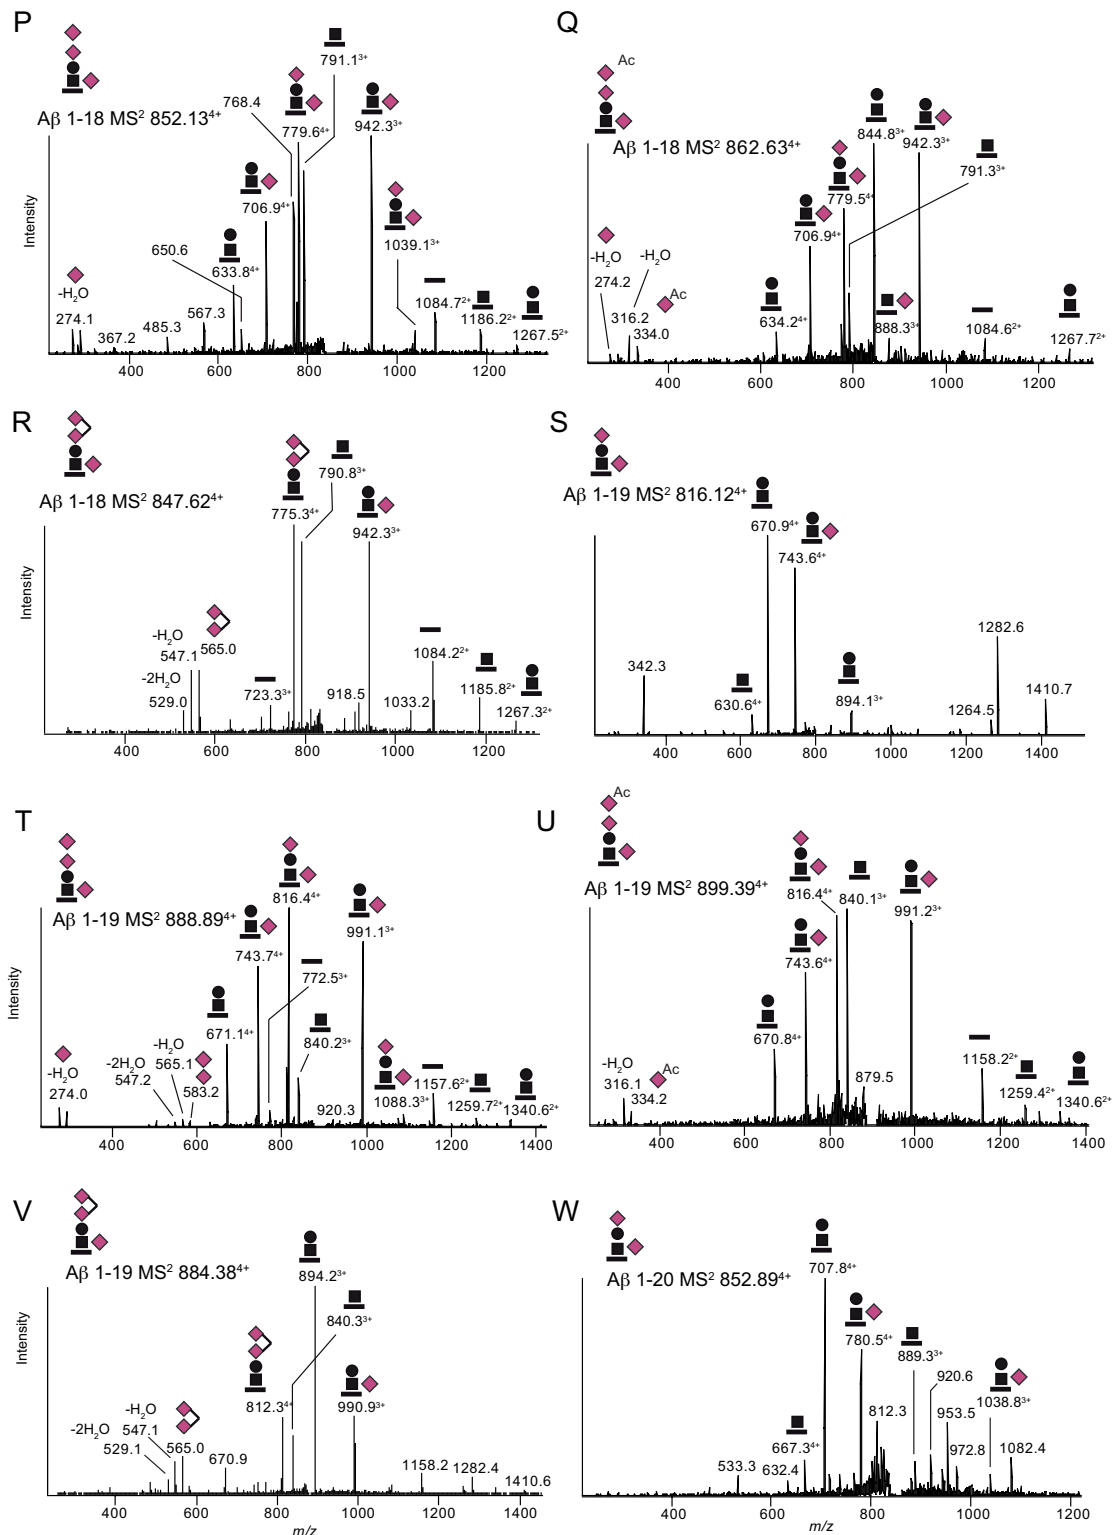

**Fig. S3. CID MS<sup>2</sup> spectra of A $\beta$ 1-X glycopeptides.** (A) MS<sup>1</sup> (left) and CID MS<sup>2</sup> (right) of SA-A $\beta$ 1-15. (B) CID MS<sup>2</sup> of SA<sub>2</sub>-A $\beta$ 4-15. (C) CID MS<sup>2</sup> of lactonized SA<sub>3</sub>-A $\beta$ 4-15. The presence of the peptide+Neu5AcHexNAc fragment ion at *m/z* 669.7 demonstrates that the disialosyl group was attached to the Hex rather than to the

HexNAc. **(D)** CID MS<sup>2</sup> spectrum of SA<sub>3</sub>-Aβ1-16. **(E)** CID MS<sup>2</sup> spectrum of lactonized SA<sub>3</sub>-Aβ 1-16. **(F)** CID MS<sup>2</sup> spectrum of SA<sub>2</sub>-Aβ -3-15. **(G)** MS<sup>2</sup> spectrum of SA-Aβ1-17 **(H)** MS<sup>2</sup> spectrum of SA<sub>2</sub>-Aβ1-17. This MS<sup>2</sup> spectrum was acquired in the ion cyclotron resonance (ICR) mode. The isotopic resolution of the fragment ions is demonstrated in the insert. The sensitivity in ICR mode is lower than for the linear quadrupole ion trap (LQIT) mode, which was used for the collection of most CID MS<sup>2</sup> spectra. **(I) - (W)** Additional CID MS<sup>2</sup> spectra of Aβ1-*X* glycopeptides. Ions are in the [M + zH]<sup>z+</sup> form and the charges are shown in superscript when z>1. The mass accuracy was <5 ppm for all precursor ions and their monoisotopic *m/z* values and charge (4+) are shown. The annotated *m/z* values of fragment ions are those picked by the Xcalibur program. The Neu5Ac oxonium ion and its loss of H<sub>2</sub>O are present at *m/z* 292 and 274, respectively. The O-AcNeu5Ac oxonium ion and its loss of H<sub>2</sub>O are present at *m/z* 334 and 316, respectively. The lactonized Neu5AcNeu5Ac oxonium ion and its loss of one and two H<sub>2</sub>O are present at *m/z* 565, 547 and 529, respectively.

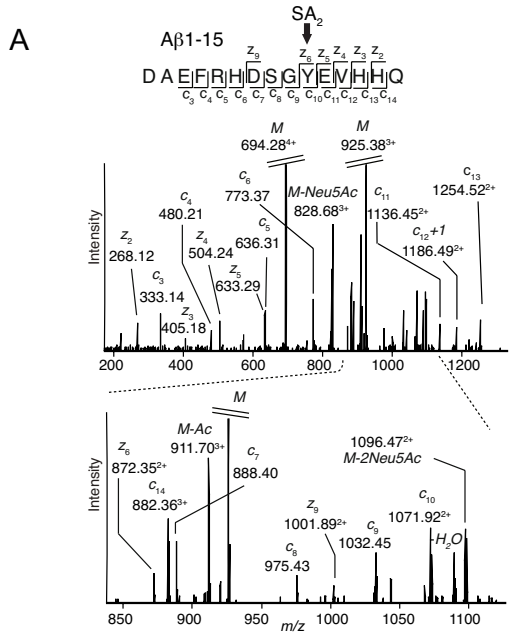

**DAEFRHDSGY(947.3230)EVHHQ**

| c         | c+2       |    | z                  | z+2 |           |           |
|-----------|-----------|----|--------------------|-----|-----------|-----------|
| ---       | ---       | 1  | <b>D</b>           | 15  | ---       | ---       |
| 204.0979  | 102.5526  | 2  | <b>A</b>           | 14  | 2643.0614 | 1322.0344 |
| 333.1405  | 167.0739  | 3  | <b>E</b>           | 13  | 2572.0243 | 1286.5158 |
| 480.2089  | 240.6081  | 4  | <b>F</b>           | 12  | 2442.9817 | 1221.9945 |
| 636.3100  | 318.6586  | 5  | <b>R</b>           | 11  | 2295.9133 | 1148.4603 |
| 773.3689  | 387.1881  | 6  | <b>H</b>           | 10  | 2139.8122 | 1070.4097 |
| 888.3959  | 444.7016  | 7  | <b>D</b>           | 9   | 2002.7533 | 1001.8803 |
| 975.4279  | 488.2176  | 8  | <b>S</b>           | 8   | 1887.7263 | 944.3668  |
| 1032.4493 | 516.7283  | 9  | <b>G</b>           | 7   | 1800.6943 | 900.8508  |
| 2142.8357 | 1071.9215 | 10 | <b>Y(947.3230)</b> | 6   | 1743.6729 | 872.3401  |
| 2271.8783 | 1136.4428 | 11 | <b>E</b>           | 5   | 633.2865  | 317.1469  |
| 2370.9467 | 1185.9770 | 12 | <b>V</b>           | 4   | 504.2439  | 252.6256  |
| 2508.0056 | 1254.5064 | 13 | <b>H</b>           | 3   | 405.1755  | 203.0914  |
| 2645.0645 | 1323.0359 | 14 | <b>H</b>           | 2   | 268.1166  | 134.5619  |
| ---       | ---       | 15 | <b>Q</b>           | 1   | 131.0577  | 66.0325   |

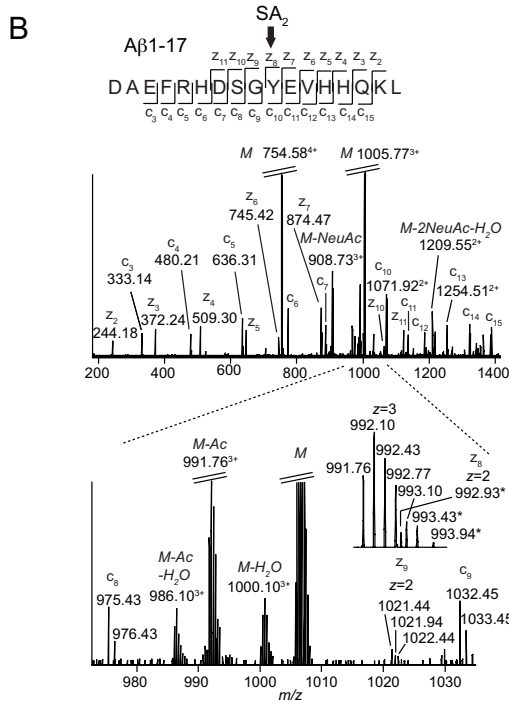

**DAEFRHDSGY(947.3230)EVHHQKL**

| c         | c+2       |    | z                  | z+2 |           |           |
|-----------|-----------|----|--------------------|-----|-----------|-----------|
| ---       | ---       | 1  | <b>D</b>           | 17  | ---       | ---       |
| 204.0979  | 102.5526  | 2  | <b>A</b>           | 16  | 2884.2405 | 1442.6239 |
| 333.1405  | 167.0739  | 3  | <b>E</b>           | 15  | 2813.2033 | 1407.1053 |
| 480.2089  | 240.6081  | 4  | <b>F</b>           | 14  | 2684.1608 | 1342.5840 |
| 636.3100  | 318.6586  | 5  | <b>R</b>           | 13  | 2537.0923 | 1269.0498 |
| 773.3689  | 387.1881  | 6  | <b>H</b>           | 12  | 2380.9912 | 1190.9993 |
| 888.3959  | 444.7016  | 7  | <b>D</b>           | 11  | 2243.9323 | 1122.4698 |
| 975.4279  | 488.2176  | 8  | <b>S</b>           | 10  | 2128.9054 | 1064.9563 |
| 1032.4493 | 516.7283  | 9  | <b>G</b>           | 9   | 2041.8733 | 1021.4403 |
| 2142.8357 | 1071.9215 | 10 | <b>Y(947.3230)</b> | 8   | 1984.8519 | 992.9296  |
| 2271.8783 | 1136.4428 | 11 | <b>E</b>           | 7   | 874.4656  | 437.7364  |
| 2370.9467 | 1185.9770 | 12 | <b>V</b>           | 6   | 745.4230  | 373.2151  |
| 2508.0056 | 1254.5064 | 13 | <b>H</b>           | 5   | 646.3545  | 323.6809  |
| 2645.0645 | 1323.0359 | 14 | <b>H</b>           | 4   | 509.2956  | 255.1515  |
| 2773.1231 | 1387.0652 | 15 | <b>Q</b>           | 3   | 372.2367  | 186.6220  |
| 2901.2180 | 1451.1127 | 16 | <b>K</b>           | 2   | 244.1781  | 122.5927  |
| ---       | ---       | 17 | <b>L</b>           | 1   | 116.0832  | 58.5452   |

**DAEFRHDSGY(365.1322)EVHHQ**

| c         | c+2       |    | z                  | z+2 |           |           |
|-----------|-----------|----|--------------------|-----|-----------|-----------|
| 133.0608  | 67.0340   | 1  | <b>D</b>           | 15  | ---       | ---       |
| 204.0979  | 102.5526  | 2  | <b>A</b>           | 14  | 2060.8706 | 1030.9390 |
| 333.1405  | 167.0739  | 3  | <b>E</b>           | 13  | 1989.8335 | 995.4204  |
| 480.2089  | 240.6081  | 4  | <b>F</b>           | 12  | 1860.7909 | 930.8991  |
| 636.3100  | 318.6586  | 5  | <b>R</b>           | 11  | 1713.7225 | 857.3649  |
| 773.3689  | 387.1881  | 6  | <b>H</b>           | 10  | 1557.6214 | 779.3143  |
| 888.3959  | 444.7016  | 7  | <b>D</b>           | 9   | 1420.5625 | 710.7849  |
| 975.4279  | 488.2176  | 8  | <b>S</b>           | 8   | 1305.5355 | 653.2714  |
| 1032.4493 | 516.7283  | 9  | <b>G</b>           | 7   | 1218.5035 | 609.7554  |
| 1560.6449 | 780.8261  | 10 | <b>Y(365.1322)</b> | 6   | 1161.4821 | 581.2447  |
| 1689.6875 | 845.3474  | 11 | <b>E</b>           | 5   | 633.2865  | 317.1469  |
| 1788.7559 | 894.8816  | 12 | <b>V</b>           | 4   | 504.2439  | 252.6256  |
| 1925.8148 | 963.4110  | 13 | <b>H</b>           | 3   | 405.1755  | 203.0914  |
| 2062.8737 | 1031.9405 | 14 | <b>H</b>           | 2   | 268.1166  | 134.5619  |
| ---       | ---       | 15 | <b>Q</b>           | 1   | 131.0577  | 66.0325   |

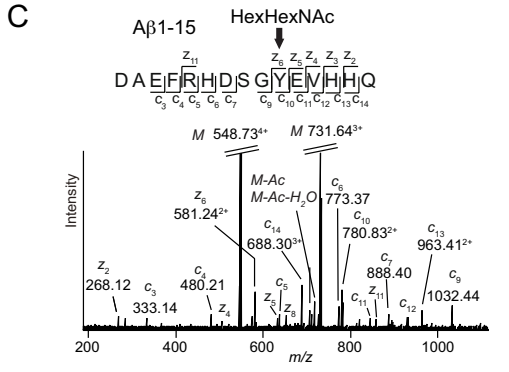



D

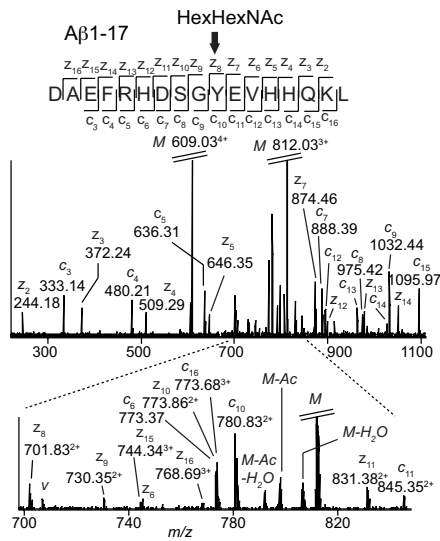

DAEFRHDSGY(365.1322)EVHHQKL

| c         | c <sup>+2</sup> |    | z           | z <sup>+2</sup> |           |           |
|-----------|-----------------|----|-------------|-----------------|-----------|-----------|
| 133.0608  | 67.0340         | 1  | D           | 17              | ---       | ---       |
| 204.0979  | 102.5526        | 2  | A           | 16              | 2302.0497 | 1151.5285 |
| 333.1405  | 167.0739        | 3  | E           | 15              | 2231.0125 | 1116.0099 |
| 480.2089  | 240.6081        | 4  | F           | 14              | 2101.9700 | 1051.4886 |
| 636.3100  | 318.6586        | 5  | R           | 13              | 1954.9015 | 977.9544  |
| 773.3689  | 387.1881        | 6  | H           | 12              | 1798.8004 | 899.9039  |
| 888.3959  | 444.7016        | 7  | D           | 11              | 1661.7415 | 831.3744  |
| 975.4279  | 488.2176        | 8  | S           | 10              | 1546.7146 | 773.8609  |
| 1032.4493 | 516.7283        | 9  | G           | 9               | 1459.6825 | 730.3449  |
| 1560.6449 | 780.8261        | 10 | Y(365.1322) | 8               | 1402.6611 | 701.8342  |
| 1689.6875 | 845.3474        | 11 | E           | 7               | 874.4656  | 437.7364  |
| 1788.7559 | 894.8816        | 12 | V           | 6               | 745.4230  | 373.2151  |
| 1925.8148 | 963.4110        | 13 | H           | 5               | 646.3545  | 323.6809  |
| 2062.8737 | 1031.9405       | 14 | H           | 4               | 509.2956  | 255.1515  |
| 2190.9323 | 1095.9698       | 15 | Q           | 3               | 372.2367  | 186.6220  |
| 2319.0272 | 1160.0173       | 16 | K           | 2               | 244.1781  | 122.5927  |
| ---       | ---             | 17 | L           | 1               | 116.0832  | 58.5452   |

E

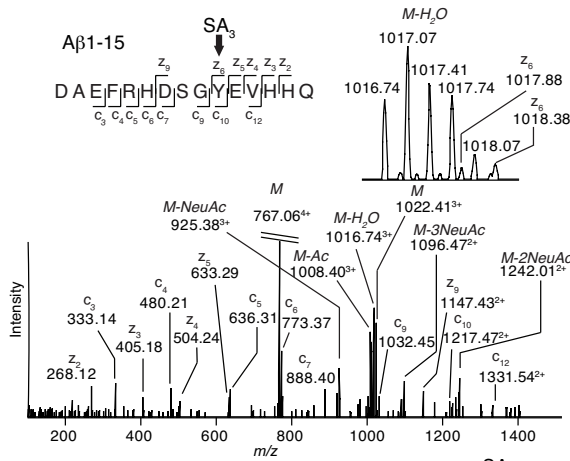

DAEFRHDSGY(1238.4184)EVHHQ

| c         | c <sup>+2</sup> |    | z            | z <sup>+2</sup> |           |           |
|-----------|-----------------|----|--------------|-----------------|-----------|-----------|
| ---       | ---             | 1  | D            | 15              | ---       | ---       |
| 204.0979  | 102.5526        | 2  | A            | 14              | 2934.1568 | 1467.5821 |
| 333.1405  | 167.0739        | 3  | E            | 13              | 2863.1197 | 1432.0635 |
| 480.2089  | 240.6081        | 4  | F            | 12              | 2734.0771 | 1367.5422 |
| 636.3100  | 318.6586        | 5  | R            | 11              | 2587.0087 | 1294.0080 |
| 773.3689  | 387.1881        | 6  | H            | 10              | 2430.9076 | 1215.9574 |
| 888.3959  | 444.7016        | 7  | D            | 9               | 2293.8487 | 1147.4280 |
| 975.4279  | 488.2176        | 8  | S            | 8               | 2178.8217 | 1089.9145 |
| 1032.4493 | 516.7283        | 9  | G            | 7               | 2091.7897 | 1046.3985 |
| 2433.9311 | 1217.4692       | 10 | Y(1238.4184) | 6               | 2034.7683 | 1017.8878 |
| 2562.9737 | 1281.9905       | 11 | E            | 5               | 633.2865  | 317.1469  |
| 2662.0421 | 1331.5247       | 12 | V            | 4               | 504.2439  | 252.6256  |
| 2799.1010 | 1400.0541       | 13 | H            | 3               | 405.1755  | 203.0914  |
| 2936.1599 | 1468.5836       | 14 | H            | 2               | 268.1166  | 134.5619  |
| ---       | ---             | 15 | Q            | 1               | 131.0577  | 66.0325   |

F

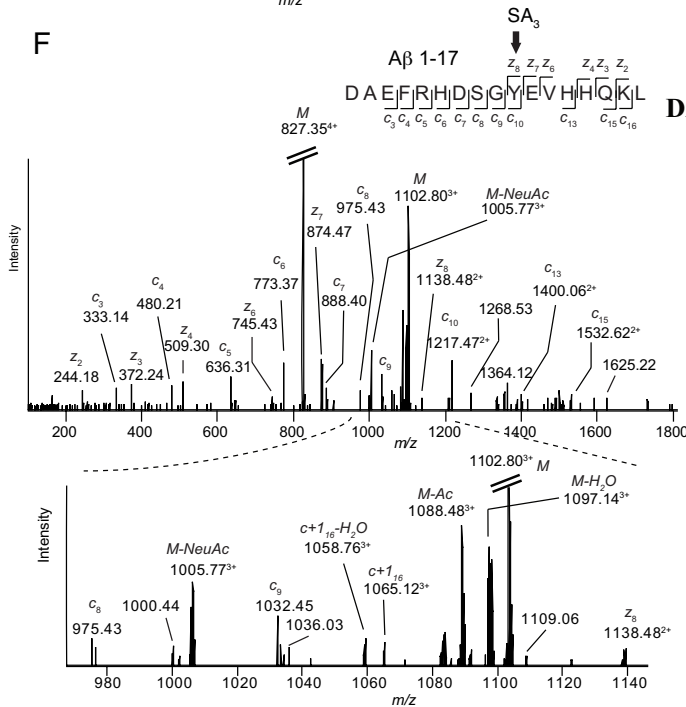

DAEFRHDSGY(1238.4184)EVHHQKL

| c         | c <sup>+2</sup> |    | z            | z <sup>+2</sup> |           |           |
|-----------|-----------------|----|--------------|-----------------|-----------|-----------|
| ---       | ---             | 1  | D            | 17              | ---       | ---       |
| 204.0979  | 102.5526        | 2  | A            | 16              | 3175.3359 | 1588.1716 |
| 333.1405  | 167.0739        | 3  | E            | 15              | 3104.2987 | 1552.6530 |
| 480.2089  | 240.6081        | 4  | F            | 14              | 2975.2562 | 1488.1317 |
| 636.3100  | 318.6586        | 5  | R            | 13              | 2828.1877 | 1414.5975 |
| 773.3689  | 387.1881        | 6  | H            | 12              | 2672.0866 | 1336.5470 |
| 888.3959  | 444.7016        | 7  | D            | 11              | 2535.0277 | 1268.0175 |
| 975.4279  | 488.2176        | 8  | S            | 10              | 2420.0008 | 1210.5040 |
| 1032.4493 | 516.7283        | 9  | G            | 9               | 2332.9687 | 1166.9880 |
| 2433.9311 | 1217.4692       | 10 | Y(1238.4184) | 8               | 2275.9473 | 1138.4773 |
| 2562.9737 | 1281.9905       | 11 | E            | 7               | 874.4656  | 437.7364  |
| 2662.0421 | 1331.5247       | 12 | V            | 6               | 745.4230  | 373.2151  |
| 2799.1010 | 1400.0541       | 13 | H            | 5               | 646.3545  | 323.6809  |
| 2936.1599 | 1468.5836       | 14 | H            | 4               | 509.2956  | 255.1515  |
| 3064.2185 | 1532.6129       | 15 | Q            | 3               | 372.2367  | 186.6220  |
| 3192.3134 | 1596.6604       | 16 | K            | 2               | 244.1781  | 122.5927  |
| ---       | ---             | 17 | L            | 1               | 116.0832  | 58.5452   |

G

Aβ 1-15

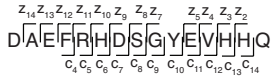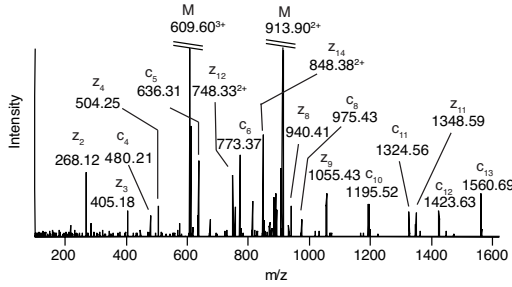

DAEFRHDSGYEVHHQ

| c         | c <sup>+2</sup> | z  | z <sup>+2</sup> |
|-----------|-----------------|----|-----------------|
| ---       | ---             | 1  | ---             |
| 204.0979  | 102.5526        | 2  | 1695.7384       |
| 333.1405  | 167.0739        | 3  | 812.8543        |
| 480.2089  | 240.6081        | 4  | 1495.6587       |
| 636.3100  | 318.6586        | 5  | 1348.5903       |
| 773.3689  | 387.1881        | 6  | 1192.4892       |
| 888.3959  | 444.7016        | 7  | 1055.4303       |
| 975.4279  | 488.2176        | 8  | 940.4033        |
| 1032.4493 | 516.7283        | 9  | 853.3713        |
| 1195.5127 | 598.2600        | 10 | 796.3499        |
| 1324.5553 | 662.7813        | 11 | 633.2865        |
| 1423.6237 | 712.3155        | 12 | 504.2439        |
| 1560.6826 | 780.8449        | 13 | 405.1755        |
| 1697.7415 | 849.3744        | 14 | 268.1166        |
| ---       | ---             | 15 | 131.0577        |
| ---       | ---             | 15 | 66.0325         |

H

Aβ 4-17

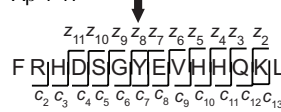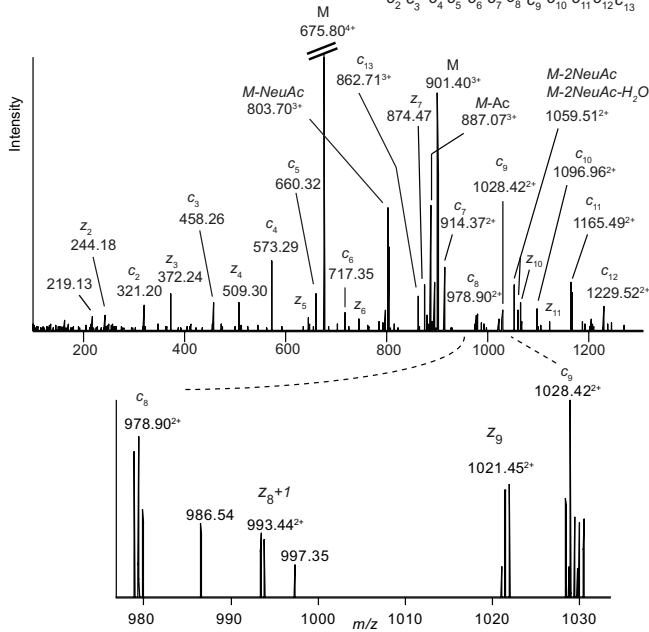

FRHDSGY(947.3230)EVHHQKL

| c         | c <sup>+2</sup> | z  | z <sup>+2</sup> |
|-----------|-----------------|----|-----------------|
| ---       | ---             | 1  | ---             |
| 321.2034  | 161.1053        | 2  | 13              |
| 458.2623  | 229.6348        | 3  | 12              |
| 573.2892  | 287.1482        | 4  | 11              |
| 660.3212  | 330.6643        | 5  | 10              |
| 717.3427  | 359.1750        | 6  | 9               |
| 1827.7290 | 914.3682        | 7  | 8               |
| 1956.7716 | 978.8894        | 8  | 7               |
| 2055.8400 | 1028.4237       | 9  | 6               |
| 2192.8989 | 1096.9531       | 10 | 5               |
| 2329.9579 | 1165.4826       | 11 | 4               |
| 2458.0164 | 1229.5119       | 12 | 3               |
| 2586.1114 | 1293.5593       | 13 | 2               |
| ---       | ---             | 14 | 1               |

VKMDAEFRHDSGY(947.3230)EVHHQ

| c         | c <sup>+2</sup> | z  | z <sup>+2</sup> |
|-----------|-----------------|----|-----------------|
| ---       | ---             | 1  | ---             |
| 245.1972  | 123.1022        | 2  | 17              |
| 376.2377  | 188.6225        | 3  | 16              |
| 491.2646  | 246.1360        | 4  | 15              |
| 562.3017  | 281.6545        | 5  | 14              |
| 691.3443  | 346.1758        | 6  | 13              |
| 838.4128  | 419.7100        | 7  | 12              |
| 994.5139  | 497.7606        | 8  | 11              |
| 1131.5728 | 566.2900        | 9  | 10              |
| 1246.5997 | 623.8035        | 10 | 9               |
| 1333.6317 | 667.3195        | 11 | 8               |
| 1390.6532 | 695.8302        | 12 | 7               |
| 2501.0395 | 1251.0234       | 13 | 6               |
| 2630.0821 | 1315.5447       | 14 | 5               |
| 2729.1505 | 1365.0789       | 15 | 4               |
| 2866.2095 | 1433.6084       | 16 | 3               |
| 3003.2684 | 1502.1378       | 17 | 2               |
| ---       | ---             | 18 | 1               |

I

Aβ -3-15

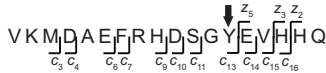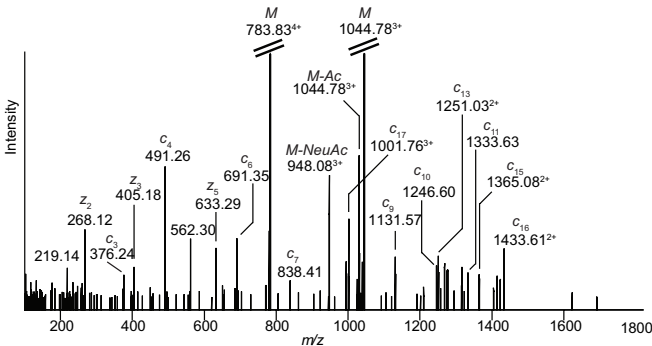

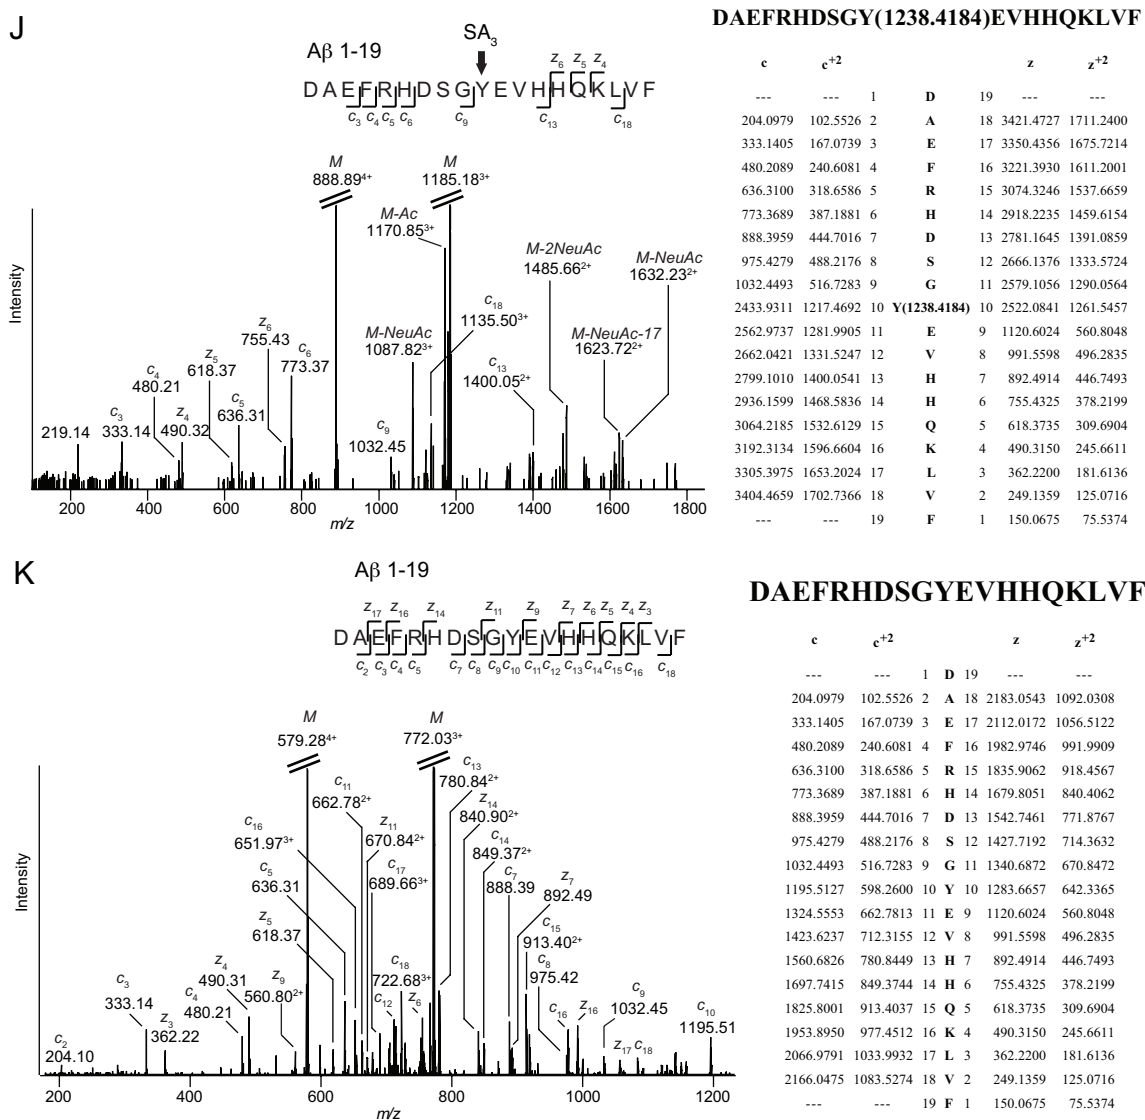

**Fig. S4. ECD MS<sup>2</sup> spectra of Aβ1-X glycopeptides (A)-(D)** Fully *m/z* annotated ECD spectra and lists of *c*- and *z*-ions accompanying **Fig. 2** of the main text. **(E)** ECD MS<sup>2</sup> spectrum of SA<sub>3</sub>-Aβ1-15. The presence of a glycosylated *z*<sub>6</sub> peak is shown in the insert. **(F)** ECD MS<sup>2</sup> spectrum of SA<sub>3</sub>-Aβ1-17. The presence of a glycosylated *z*<sub>8</sub> peak is shown in the expansion. **(G)** ECD MS<sup>2</sup> spectrum of Aβ1-15 peptide. **(H)** ECD MS<sup>2</sup> spectrum of SA<sub>2</sub>-Aβ4-17. The presence of glycosylated *z*<sub>8</sub> and *z*<sub>9</sub> peaks is shown in the expansion **(I)** ECD MS<sup>2</sup> spectrum of SA<sub>2</sub>-Aβ-3-15. **(J)** ECD MS<sup>2</sup> spectrum of SA<sub>3</sub>-Aβ1-19. **(K)** ECD MS<sup>2</sup> spectrum of Aβ1-19 peptide. The lists of *c*- and *z*-series of peptide backbone fragments were prepared by the use of the MS product utility at the Protein Prospector homepage (<http://prospector.ucsf.edu/prospector/cgi-bin/msform.cgi?form=msproduct>). The identified fragment ions are annotated in the spectra, and shown in relation to the peptide sequences. The molecular ion and its charged reduced forms (*M*) are present in the spectra. *M-Ac*, loss of acetyl from *M*. The peaks were expanded and the *M* peaks were cropped.

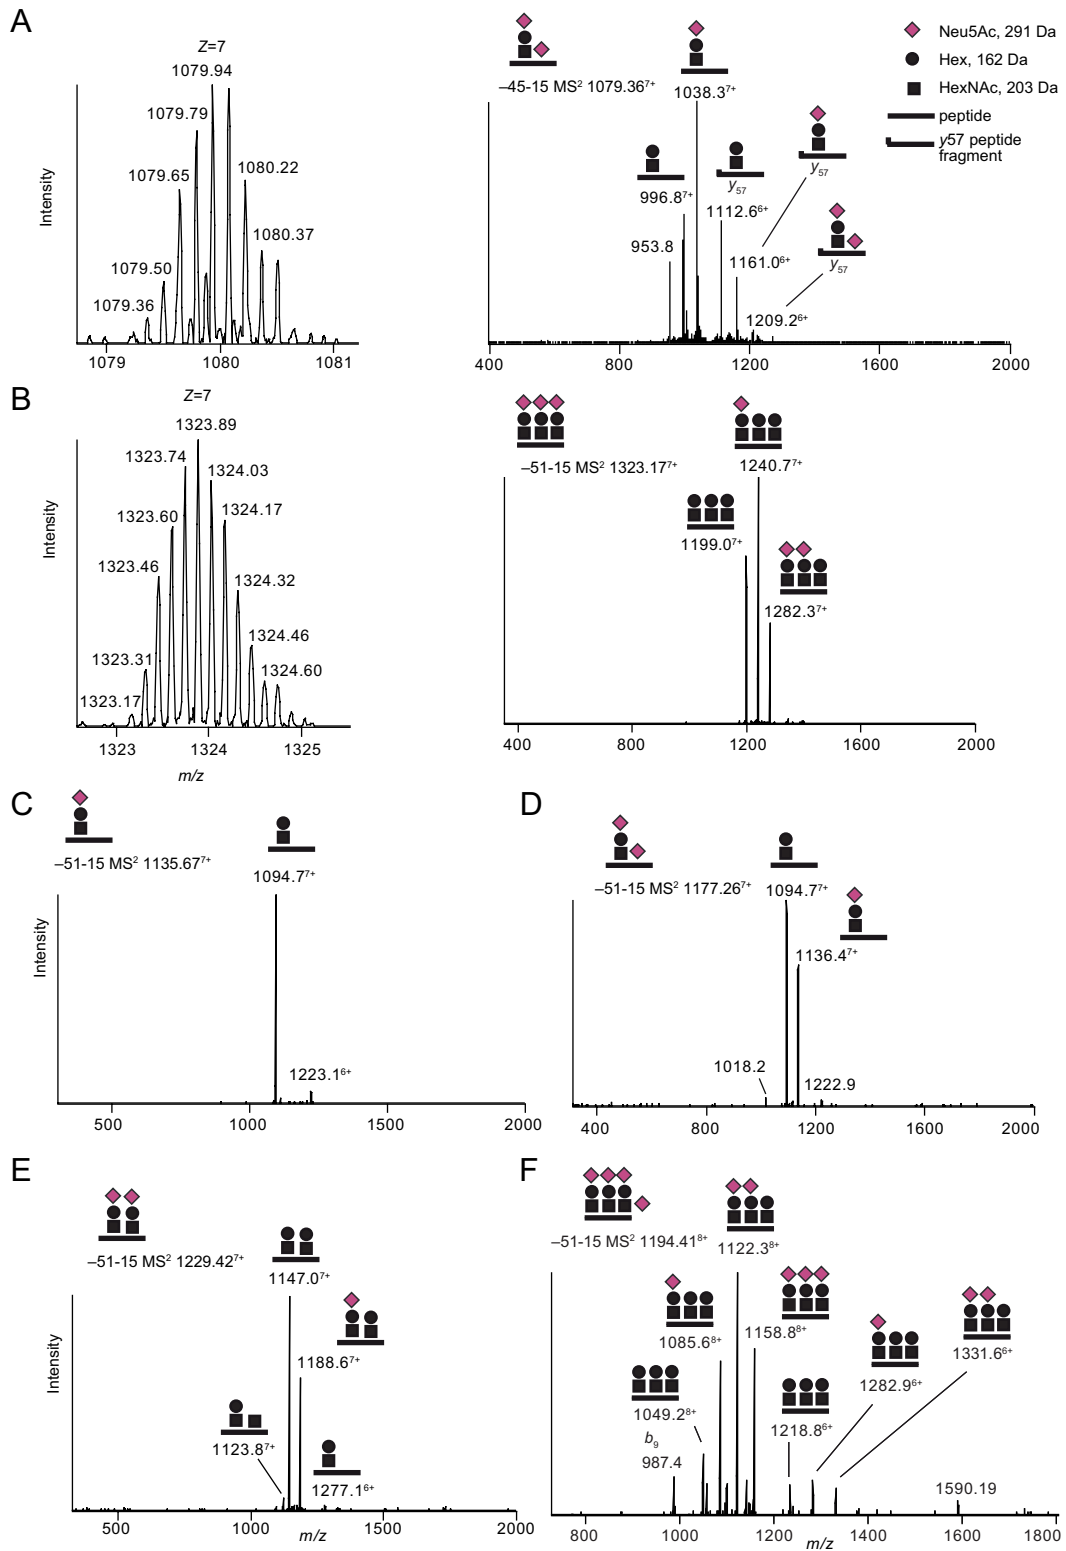

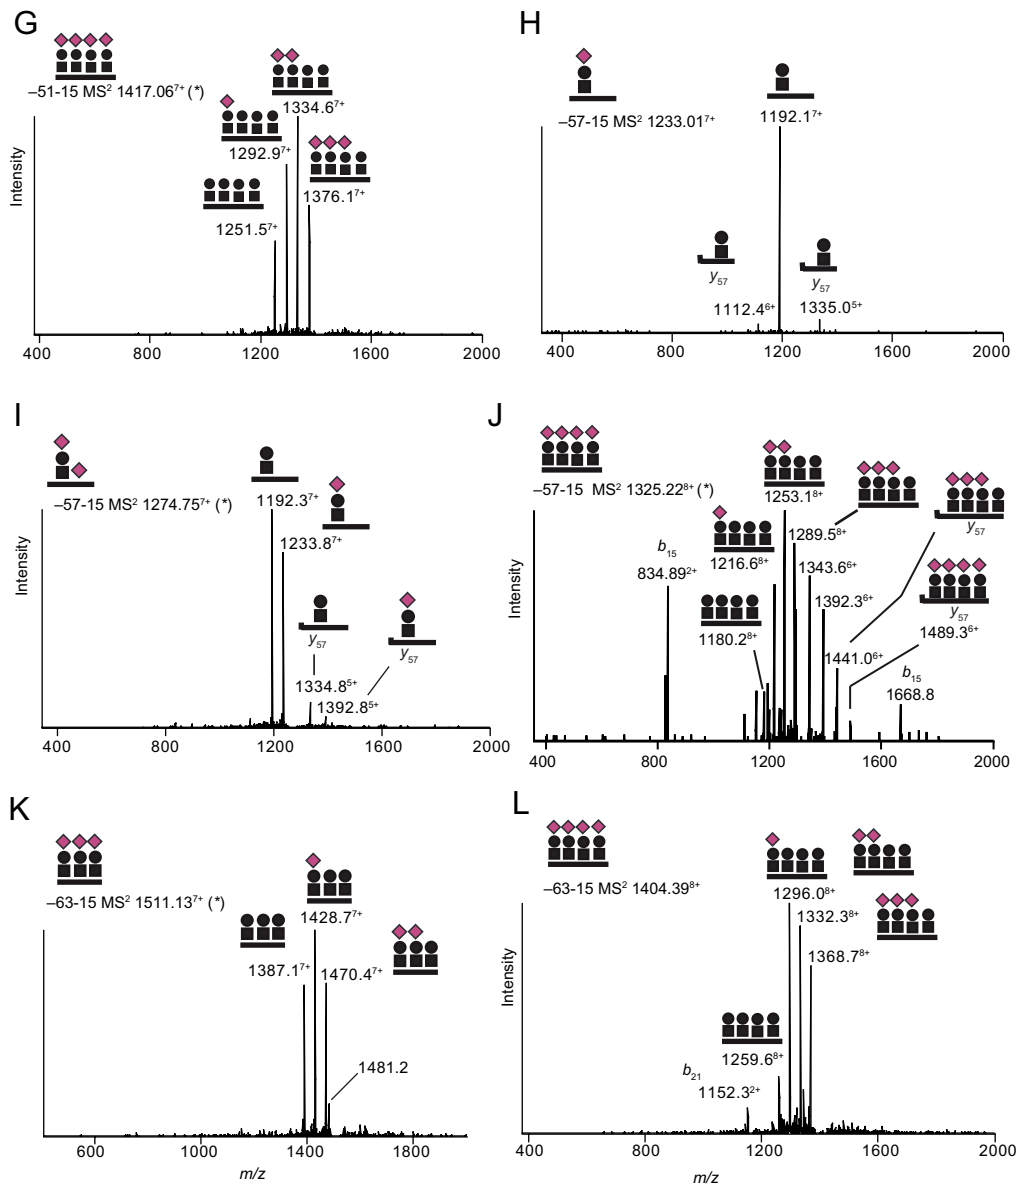

**Fig. S5. CID MS<sup>2</sup> of additional APP/A $\beta$ X-15 glycopeptides.** (A) MS<sup>1</sup> and CID MS<sup>2</sup> of Neu5AcHex(Neu5Ac)HexNAc APP/A $\beta$ -45-15 showing the diagnostic y<sub>57</sub> peptide fragment peaks. (B) MS<sup>1</sup> and CID MS<sup>2</sup> of (Neu5AcHexHexNAc)<sub>3</sub> APP/A $\beta$ -51-15. The same glycopeptide possessing different charges, are fragmented here (z = 7) and in Fig. 4C of the main text (z = 8). The diagnostic b<sub>9</sub> and y<sub>57</sub> ion peaks were only visible for z = 8, and were generally more pronounced at the higher charge state of the APP/A $\beta$ X-15 glycopeptides. (C) - (L) CID MS<sup>2</sup> spectra of additional APP/A $\beta$ X-15 glycopeptides. \*The MS<sup>1</sup> peaks for the monoisotopic m/z value were not visible and the measured m/z values for the second isotopes are given instead.

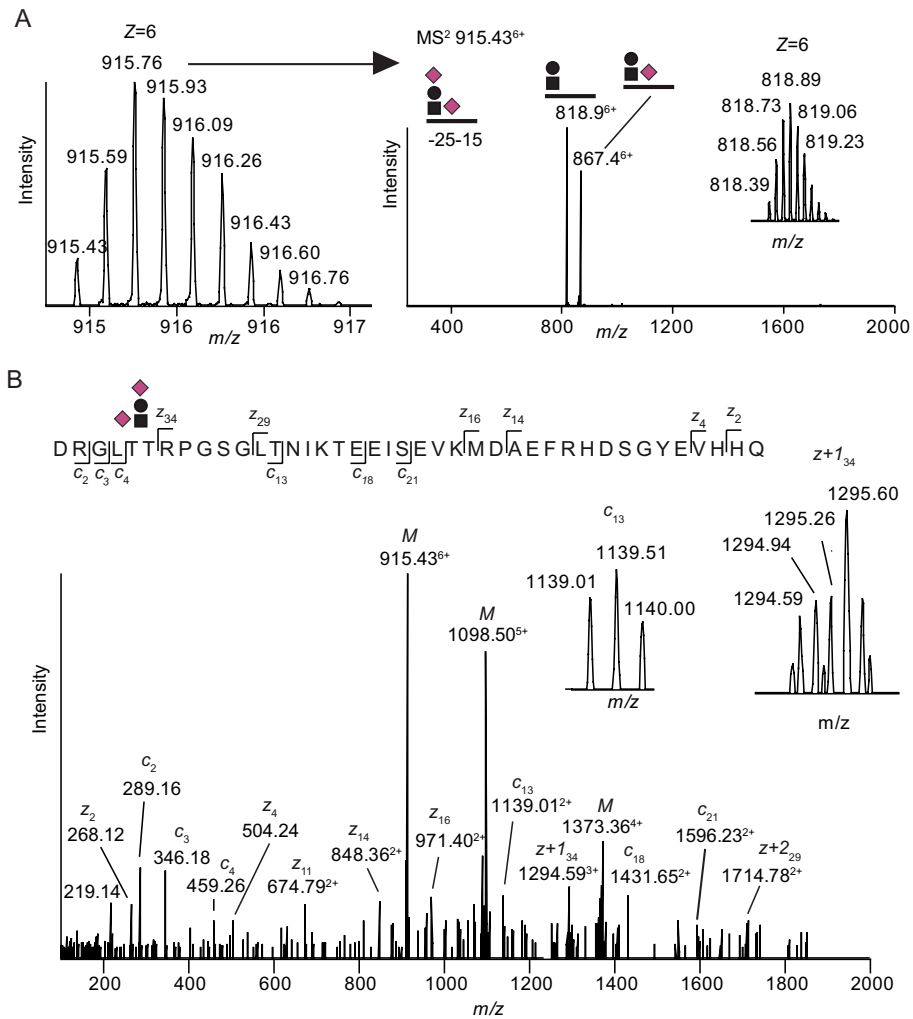

**Fig. S6. CID and ECD MS<sup>2</sup> of Neu5AcHex(Neu5Ac)HexNAc-APP/Aβ-25-15 (A) MS<sup>1</sup> (left) and CID MS<sup>2</sup> (right) and (B) ECD MS<sup>2</sup> spectrum of Neu5AcHex(Neu5Ac)HexNAc - APP/Aβ-25-15. CID MS<sup>2</sup> was acquired in ICR mode. Isotopic distributions of fragment ions are demonstrated in the inserts supporting the evidence of significant fragments. Selected *c*- and *z*-fragments are annotated and shown in relation to the peptide sequence. The attachment site for the glycan was either Thr(-21) or Thr(-20).**

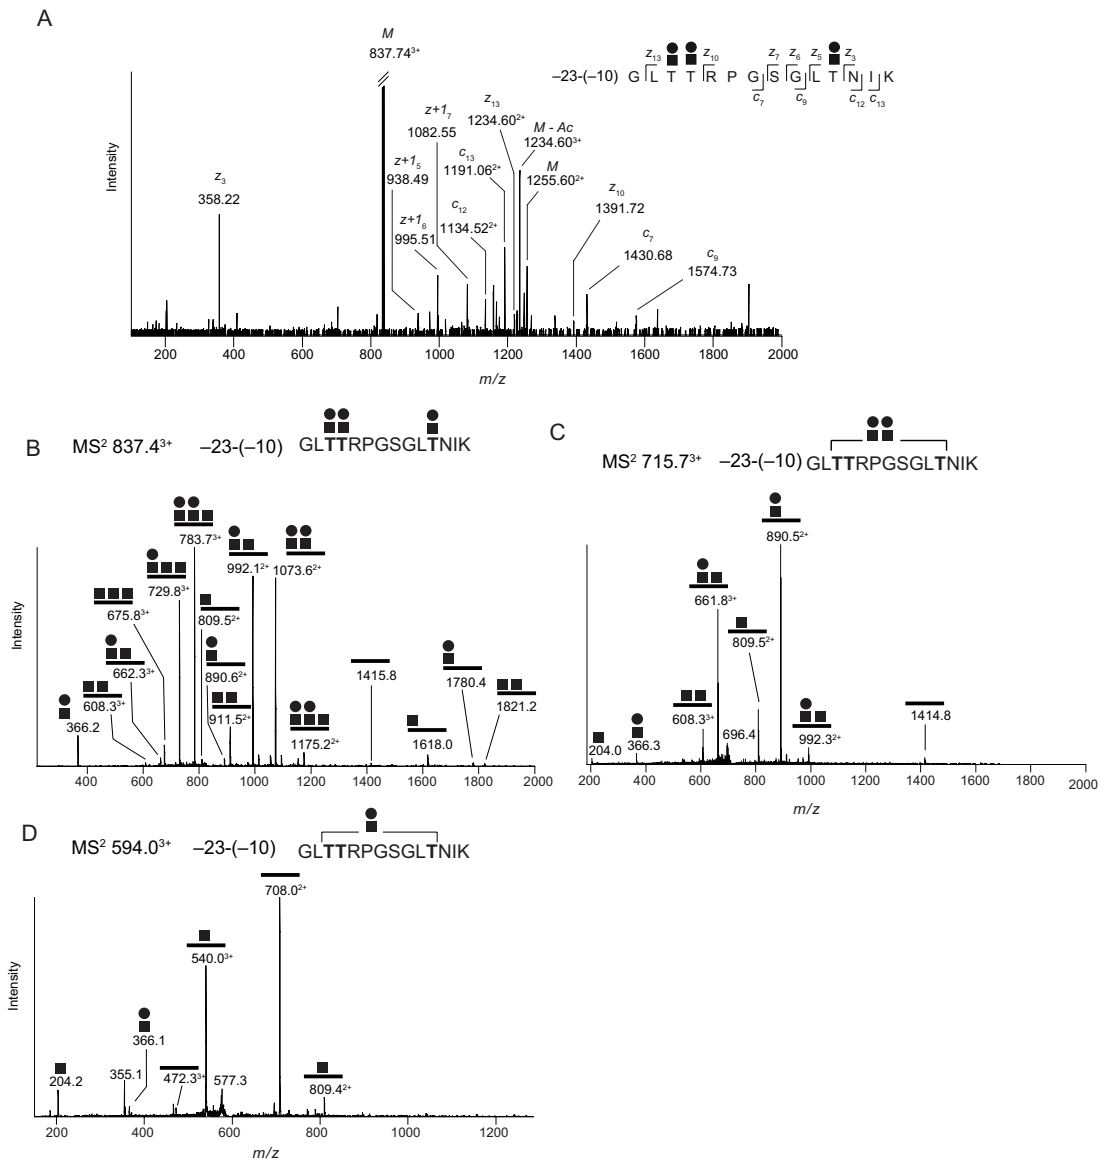

**Fig. S7. Identification of Thr (-21, -20 and -13) glycosylation sites. (A)** ECD spectrum of the -23(-10) glycopeptide with three HexHexNAc glycans at Thr (-21, -20 and -13). The amino acid numbering is according to the A $\beta$  sequence. Ser(-16) was excluded as a glycosylation site in this glycopeptide. Sialic acids were originally present on the glycopeptides but were removed as a part of the enrichment protocol. **(B)** CID MS<sup>2</sup> spectrum of the same -23(-10) glycopeptide as in **(A)**. **(C)** CID MS<sup>2</sup> of the -23(-10) glycopeptide with two HexHexNAc glycans. **(D)** CID MS<sup>2</sup> of the -23(-10) glycopeptide with one HexHexNAc glycan. The peptide ion peak in the MS<sup>2</sup> spectra ( $m/z$  708.0) gave peptide fragmentation in the MS<sup>3</sup> spectrum, which was used to determine the peptide identity by Mascot database searching (See Table S2).

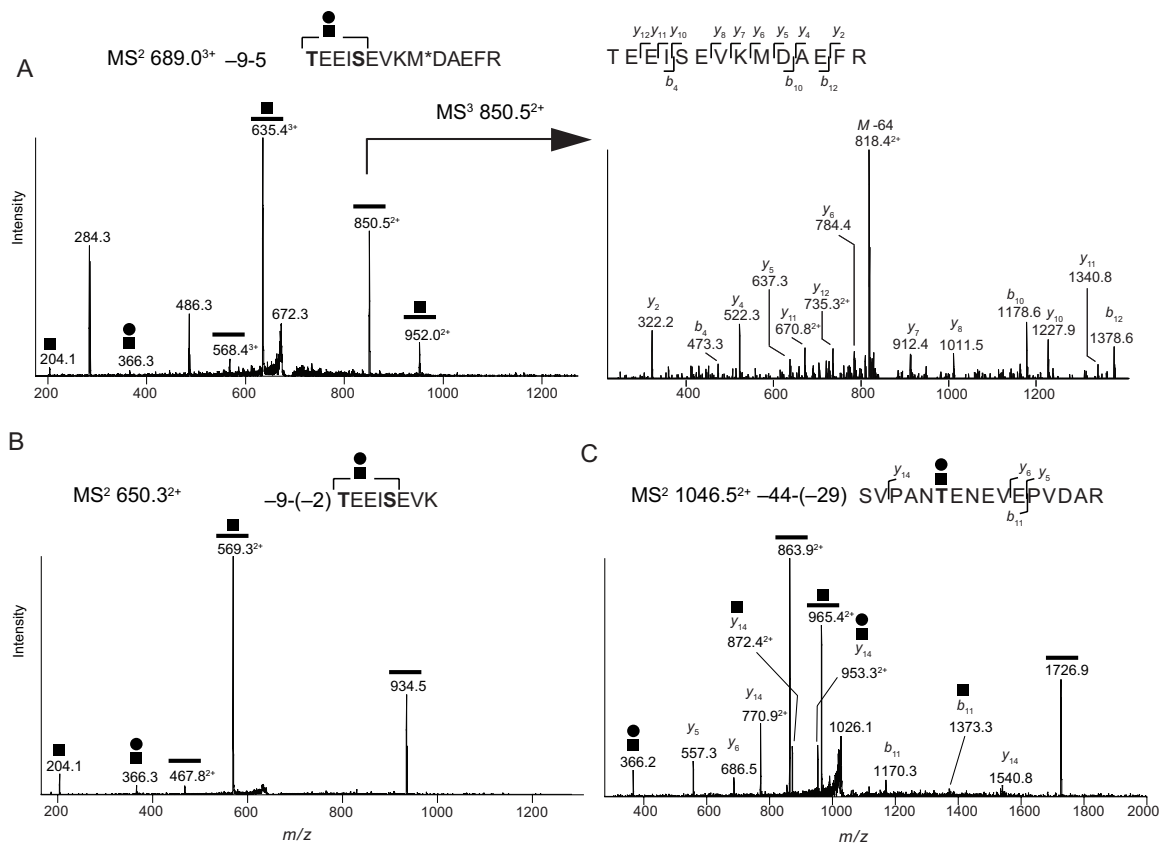

**Fig. S8. Identification of Thr(-39) and Ser(-5) / Thr(-9) glycosylation sites. (A)** CID MS<sup>2</sup> of the -9-5 glycopeptide with one HexHexNAc glycan (left). The glycosylation site was either Ser(-5) or Thr(-9). The deglycosylated peptide ion ( $m/z$  850.5) present in the MS<sup>2</sup> spectrum gave peptide fragmentation in the MS<sup>3</sup> spectrum (right), which was subjected to Mascot database searching to determine the glycopeptide identity (see **Table S2**). \*The methionine was oxidized (+16 Da) resulting in a characteristic neutral loss of 64 Da from the oxidized Met in the CID MS<sup>3</sup> spectrum ( $M-64$ ). **(B)** CID MS<sup>2</sup> of the -9(-2) glycopeptide carrying one HexHexNAc glycan on either Ser(-5) or Thr(-9). **(C)** CID MS<sup>2</sup> of the -44(-29) glycopeptide carrying one HexHexNAc glycan. The presence of glycosylated y<sub>14</sub> peptide fragments in the MS<sup>2</sup> spectrum pinpointed the glycosylation site to Thr(-39). The y<sub>14</sub> fragments represent the same fragmentation site as for the prominent y<sub>57</sub> fragment ions for the APP/A $\beta$ X-15 glycopeptides (see **Fig. 4** and **Fig. S5**).



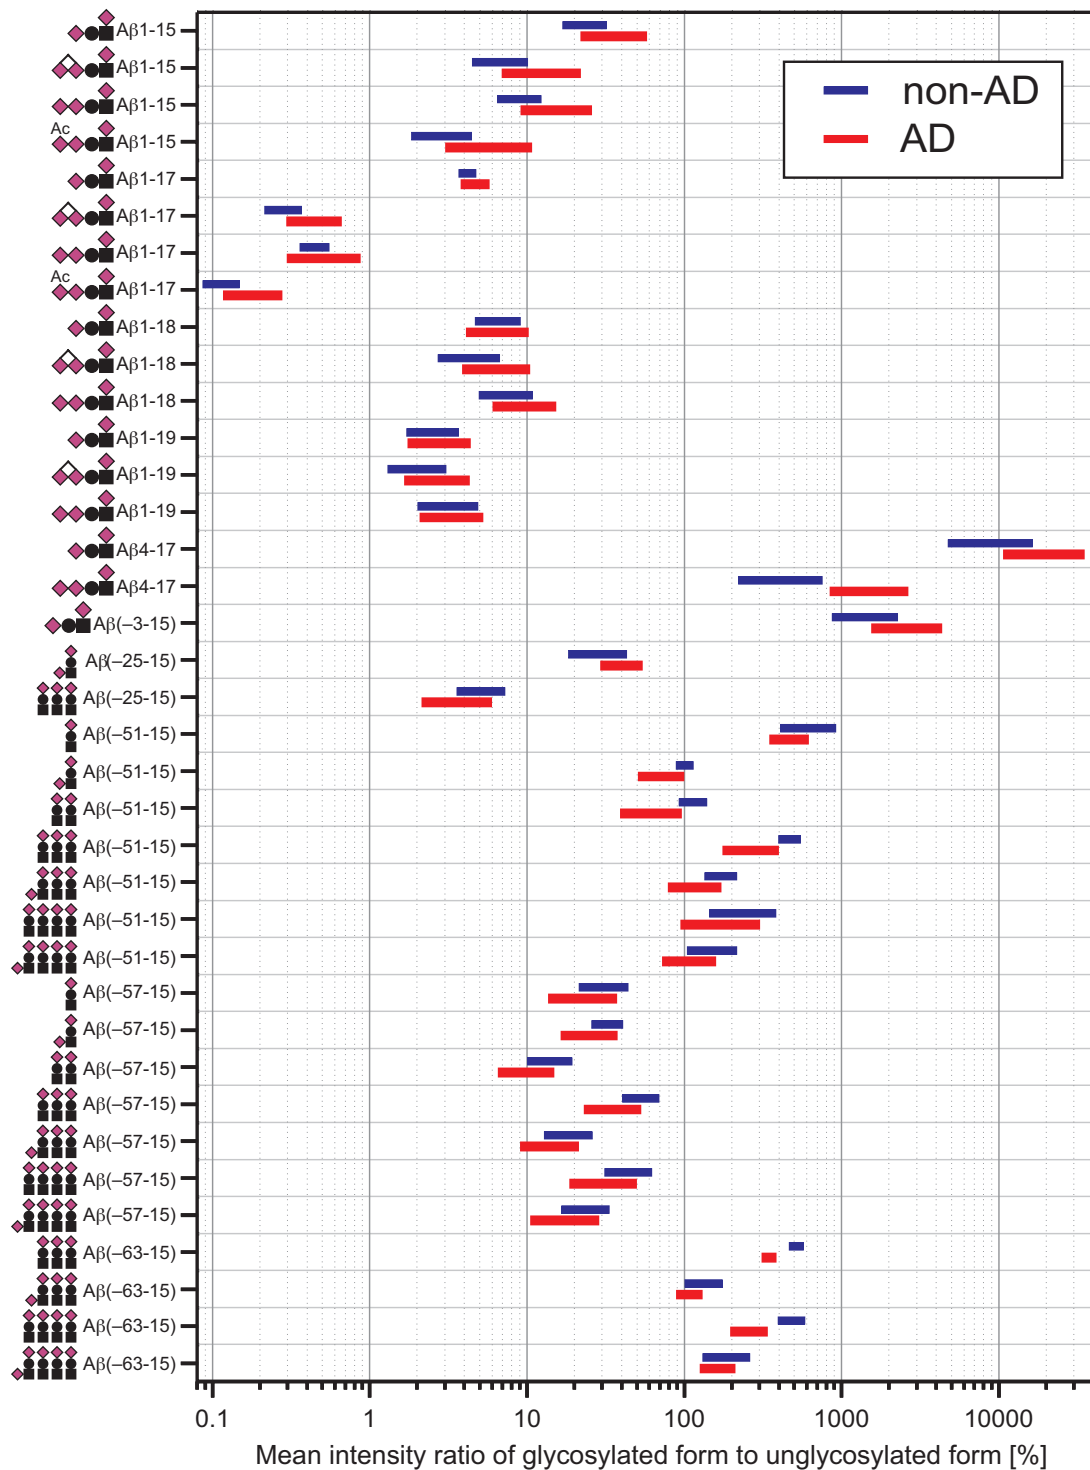

**Fig. S9. Mean intensity ratios of APP/A $\beta$  glycopeptides versus the corresponding unglycosylated peptides for AD and non-AD patients.** A mean ratio of 1 was set to 100% and the extensions of the bars represent one standard deviation around the mean. The ratios were generally higher for AD compared to non-AD for most of the A $\beta$ 1-X peptides, while the opposite was observed for most of the APP/A $\beta$  X-15 peptides.

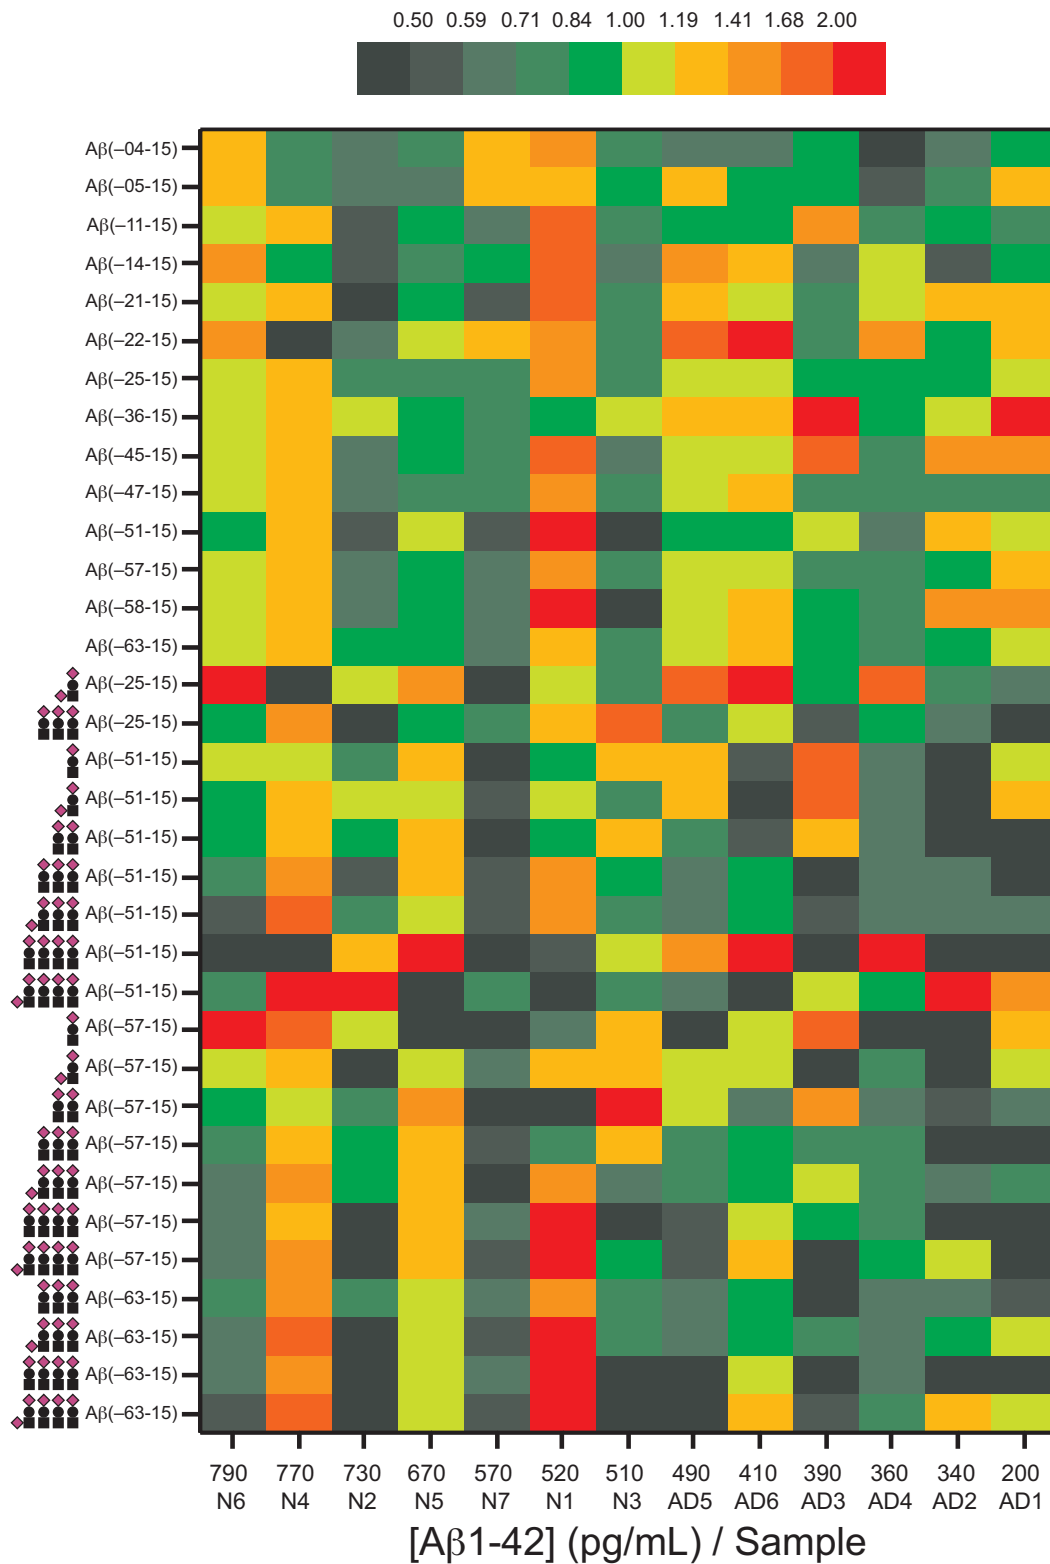

**Fig. S10.** Heat map showing the relative signal intensities of individual APP/AβX-15 peptides and glycopeptides for AD and non-AD patients. Data were normalized in the same way as in Fig. 3 of the main text (see also Fig. S9 and Table S1).

**Table S1.** Structures and relative intensities of 6E10 immunopurified APP/A $\beta$  peptides and glycopeptides of human CSF samples. The glycosylated/unglycosylated spectral intensity ratios for A $\beta$  peptides and glycopeptides from AD versus non-AD patients (nonAD) are shown.

| Peptide/Glycopeptide <sup>a</sup>      | Calculated monoisotopic mass (Da) | MS <sup>2</sup> data <sup>b</sup> | AD vs. C (mean C set to 1) <sup>c</sup> |                 |         |             | Mean intensity (log <sub>10</sub> ) <sup>d</sup> |
|----------------------------------------|-----------------------------------|-----------------------------------|-----------------------------------------|-----------------|---------|-------------|--------------------------------------------------|
|                                        |                                   |                                   | Mean nonAD                              | Std dev. non-AD | Mean AD | Std dev. AD |                                                  |
| A $\beta$ 1-13                         | 1560.6593                         | Y                                 | 1.0                                     | 0.2             | 0.7     | 0.2         | 5.3                                              |
| A $\beta$ 1-14                         | 1697.7182                         | Y                                 | 1.0                                     | 0.1             | 0.9     | 0.1         | 5.9                                              |
| A $\beta$ 1-15                         | 1825.7768                         | S4G                               | 1.0                                     | 0.2             | 0.9     | 0.2         | 6.0                                              |
| SaHHn-A $\beta$ 1-15                   | 2482.0044                         | S3A                               | 1.0                                     | 0.3             | 1.1     | 0.5         | 3.6                                              |
| Sa <sub>2</sub> HHn-A $\beta$ 1-15     | 2773.0999                         | F1A, F2A                          | 1.0                                     | 0.1             | 1.4     | 0.1         | 5.1                                              |
| LaSa <sub>2</sub> SaHHn-A $\beta$ 1-15 | 3046.1847                         | F1D                               | 1.0                                     | 0.2             | 1.9     | 0.1         | 4.4                                              |
| Sa <sub>3</sub> HHn-A $\beta$ 1-15     | 3064.1953                         | F1B, S4E                          | 1.0                                     | 0.1             | 1.6     | 0.0         | 4.7                                              |
| Ac-Sa <sub>3</sub> HHn-A $\beta$ 1-15  | 3106.2058                         | F1C                               | 1.0                                     | 0.3             | 2.3     | 0.3         | 4.0                                              |
| A $\beta$ 1-16                         | 1953.8718                         | Y                                 | 1.0                                     | 0.2             | 1.1     | 0.2         | 5.3                                              |
| LaSa <sub>2</sub> SaHHn-A $\beta$ 1-16 | 3174.2797                         | S3E                               | Below threshold                         |                 |         |             | <3.0                                             |
| Sa <sub>3</sub> HHn-A $\beta$ 1-16     | 3192.2902                         | S3D                               | Below threshold                         |                 |         |             | <3.0                                             |
| A $\beta$ 1-17                         | 2066.9559                         | Y                                 | 1.0                                     | 0.1             | 1.0     | 0.1         | 7.3                                              |
| SaHHn-A $\beta$ 1-17                   | 2723.1835                         | S3G                               | 1.0                                     | 0.4             | 1.1     | 0.3         | 4.6                                              |
| Sa <sub>2</sub> HHn-A $\beta$ 1-17     | 3014.2789                         | F2B, S3H                          | 1.0                                     | 0.1             | 1.2     | 0.1         | 5.8                                              |
| LaSa <sub>2</sub> SaHHn-A $\beta$ 1-17 | 3287.3637                         | S3K                               | 1.0                                     | 0.2             | 1.6     | 0.1         | 4.5                                              |
| Sa <sub>3</sub> HHn-A $\beta$ 1-17     | 3305.3743                         | S3I, S4F                          | 1.0                                     | 0.1             | 1.2     | 0.3         | 4.7                                              |
| Ac-Sa <sub>3</sub> HHn-A $\beta$ 1-17  | 3347.3849                         | S3J                               | 1.0                                     | 0.2             | 1.5     | 0.1         | 4.1                                              |
| A $\beta$ 1-18                         | 2166.0243                         | Y                                 | 1.0                                     | 0.2             | 1.0     | 0.1         | 6.0                                              |
| Sa <sub>2</sub> HHn-A $\beta$ 1-18     | 3113.3473                         | S3O                               | 1.0                                     | 0.1             | 1.1     | 0.1         | 4.4                                              |
| LaSa <sub>2</sub> SaHHn-A $\beta$ 1-18 | 3386.4321                         | S3R                               | 1.0                                     | 0.3             | 2.5     | 0.5         | 4.1                                              |
| Sa <sub>3</sub> HHn-A $\beta$ 1-18     | 3404.4427                         | S3P                               | 1.0                                     | 0.2             | 1.4     | 0.4         | 4.5                                              |
| Ac-Sa <sub>3</sub> HHn-A $\beta$ 1-18  | 3446.4533                         | S3Q                               | 1.0                                     | 0.2             | 1.3     | 0.5         | 3.2                                              |
| A $\beta$ 1-19                         | 2313.0927                         | S4K                               | 1.0                                     | 0.1             | 1.2     | 0.1         | 7.3                                              |
| Sa <sub>2</sub> HHn-A $\beta$ 1-19     | 3260.4157                         | S3S                               | 1.0                                     | 0.1             | 1.4     | 0.2         | 5.3                                              |
| LaSa <sub>2</sub> SaHHn-A $\beta$ 1-19 | 3533.5006                         | S3V                               | 1.0                                     | 0.4             | 2.5     | 0.6         | 5.2                                              |
| Sa <sub>3</sub> HHn-A $\beta$ 1-19     | 3551.5111                         | S3T, S4J                          | 1.0                                     | 0.2             | 1.9     | 0.4         | 5.4                                              |
| Ac-Sa <sub>3</sub> HHn-A $\beta$ 1-19  | 3593.5217                         | S3U                               | 1.0                                     | 0.2             | 1.4     | 0.3         | 4.2                                              |
| A $\beta$ 1-20                         | 2460.1611                         | Y                                 | 1.0                                     | 0.2             | 1.0     | 0.2         | 5.9                                              |
| Sa <sub>2</sub> HHn-A $\beta$ 1-20     | 3407.4841                         | S3W                               | 1.0                                     | 0.5             | 0.8     | 0.4         | 3.9                                              |
| A $\beta$ 1-28                         | 3260.5275                         | Y                                 | 1.0                                     | 0.3             | 0.5     | 0.2         | 6.3                                              |
| A $\beta$ 1-30                         | 3388.5861                         | Y                                 | 1.0                                     | 0.1             | 1.1     | 0.1         | 6.7                                              |
| A $\beta$ 1-33                         | 3671.7757                         | Y                                 | 1.0                                     | 0.1             | 1.0     | 0.1         | 7.5                                              |
| A $\beta$ 1-34                         | 3784.8598                         | Y                                 | 1.0                                     | 0.1             | 0.8     | 0.1         | 7.6                                              |
| A $\beta$ 1-37                         | 4071.9901                         | Y                                 | 1.0                                     | 0.0             | 1.0     | 0.0         | 7.9                                              |
| A $\beta$ 1-38                         | 4129.0116                         | Y                                 | 1.0                                     | 0.0             | 1.0     | 0.0         | 8.6                                              |
| A $\beta$ 1-39                         | 4228.0800                         | Y                                 | 1.0                                     | 0.0             | 1.2     | 0.1         | 7.8                                              |
| A $\beta$ 1-40                         | 4327.1484                         | Y                                 | 1.0                                     | 0.0             | 1.0     | 0.0         | 8.8                                              |

|                                                                     |            |          |                 |     |      |      |      |
|---------------------------------------------------------------------|------------|----------|-----------------|-----|------|------|------|
| Aβ1-42                                                              | 4511.2696  | Y        | 1.0             | 0.2 | 0.5  | 0.1  | 6.6  |
| Aβ4-15                                                              | 1510.6702  | N        | Below threshold |     |      |      | <3.0 |
| Sa <sub>2</sub> HHn-Aβ4-15                                          | 2457.9932  | S3B      | 1.0             | 0.4 | 2.2  | 0.9  | 4.0  |
| LaSa <sub>2</sub> SaHHn-Aβ4-15                                      | 2731.0781  | S3C      | Below threshold |     |      |      | <3.0 |
| Aβ4-17                                                              | 1751.8492  | N        | 1.0             | 0.2 | 0.9  | 0.1  | 4.3  |
| Sa <sub>2</sub> HHn-Aβ4-17                                          | 2699.1722  | S3L, S4H | 1.0             | 0.1 | 1.4  | 0.1  | 5.3  |
| Sa <sub>3</sub> HHn-Aβ4-17                                          | 2990.2676  | S3M      | 1.0             | 0.1 | 2.1  | 0.1  | 4.1  |
| Aβ5-17                                                              | 1604.7808  | N        | 1.0             | 0.2 | 0.6  | 0.1  | 4.3  |
| Sa <sub>2</sub> HHn-Aβ5-17                                          | 2552.1038  | S3N      | Below threshold |     |      |      | <3.0 |
| Aβ(-3-15)                                                           | 2183.9812  | N        | 1.0             | 0.4 | 0.4  | 0.2  | 3.6  |
| Sa <sub>2</sub> HHn-Aβ(-3-15)                                       | 3131.3043  | S3F, S4I | 1.0             | 0.1 | 1.1  | 0.2  | 4.4  |
| Aβ(-4-15)                                                           | 2313.0238  | Y        | 1.0             | 0.2 | 0.7  | 0.1  | 5.2  |
| Aβ(-5-15)                                                           | 2400.0558  | Y        | 1.0             | 0.1 | 1.0  | 0.1  | 5.5  |
| Aβ(-11-15)                                                          | 3113.4518  | Y        | 1.0             | 0.2 | 1.0  | 0.1  | 5.9  |
| Aβ(-14-15)                                                          | 3441.6264  | Y        | 1.0             | 0.2 | 1.0  | 0.2  | 5.5  |
| Aβ(-21-15)                                                          | 4097.9506  | Y        | 1.0             | 0.2 | 1.1  | 0.1  | 6.0  |
| Aβ(-22-15)                                                          | 4211.0347  | Y        | 1.0             | 0.2 | 1.4  | 0.2  | 6.4  |
| Aβ(-25-15)                                                          | 4539.1842  | Y        | 1.0             | 0.1 | 1.0  | 0.1  | 7.3  |
| SaHHn-Aβ(-25-15)                                                    | 5195.4118  | N        | 1.0             | 0.1 | 1.0  | 0.2  | 6.3  |
| Sa <sub>2</sub> HHn-Aβ(-25-15)                                      | 5486.5073  | S6       | 1.0             | 0.3 | 1.4  | 0.3  | 6.8  |
| (SaHHn) <sub>3</sub> -Aβ(-25-15)                                    | 6507.8671  | F4B      | 1.0             | 0.2 | 0.7  | 0.2  | 5.8  |
| Aβ(-45-15)                                                          | 6601.1445  | Y        | 1.0             | 0.2 | 1.3  | 0.2  | 7.0  |
| Sa <sub>2</sub> HHn-Aβ(-45-15)                                      | 7548.4676  | S5A      | 1.0             | 0.1 | 0.9  | 0.1  | 6.6  |
| Aβ(-51-15)                                                          | 7286.4418  | Y        | 1.0             | 0.2 | 1.0  | 0.1  | 6.4  |
| SaHHn-Aβ(-51-15)                                                    | 7942.6694  | S5C      | 1.0             | 0.1 | 0.9  | 0.2  | 7.1  |
| Sa <sub>2</sub> HHn-Aβ(-51-15)                                      | 8233.7649  | S5D      | 1.0             | 0.1 | 0.9  | 0.3  | 6.4  |
| (SaHHn) <sub>2</sub> -Aβ(-51-15)                                    | 8598.8970  | S5E      | 1.0             | 0.1 | 0.5  | 0.2  | 6.5  |
| Sa <sub>2</sub> HHnSaHHn-Aβ(-51-15)                                 | 8889.9925  | N        | 1.0             | 0.4 | 1.0  | 0.5  | 6.0  |
| (SaHHn) <sub>3</sub> -Aβ(-51-15)                                    | 9255.1247  | F4C, S5B | 1.0             | 0.2 | 0.5  | 0.1  | 7.1  |
| Sa <sub>2</sub> HHn(SaHHn) <sub>2</sub> -Aβ(-51-15)                 | 9546.2201  | S5F      | 1.0             | 0.2 | 0.7  | 0.0  | 6.7  |
| (SaHHn) <sub>4</sub> -Aβ(-51-15)                                    | 9911.3523  | S5G      | 1.0             | 0.5 | 1.1  | 0.6  | 6.8  |
| Sa <sub>2</sub> HHn(SaHHn) <sub>3</sub> -Aβ(-51-15)                 | 10202.4477 | Y        | 1.0             | 0.4 | 1.1  | 0.3  | 6.6  |
| (Sa <sub>2</sub> HHn) <sub>2</sub> (SaHHn) <sub>2</sub> -Aβ(-51-15) | 10493.5431 | N        | 1.0             | 0.3 | 0.8  | 0.2  | 6.0  |
| (SaHHn) <sub>5</sub> -Aβ(-51-15)                                    | 10567.5799 | N        | 1.0             | 0.4 | 0.7  | 0.3  | 5.8  |
| Sa <sub>2</sub> HHn(SaHHn) <sub>4</sub> -Aβ(-51-15)                 | 10858.6753 | N        | 1.0             | 0.3 | 0.6  | 0.1  | 5.3  |
| Aβ(-57-15)                                                          | 7967.7751  | Y        | 1.0             | 0.1 | 1.0  | 0.1  | 7.2  |
| SaHHn-Aβ(-57-15)                                                    | 8624.0027  | S5H      | 1.0             | 0.3 | 0.8  | 0.3  | 6.6  |
| Sa <sub>2</sub> HHn-Aβ(-57-15)                                      | 8915.0982  | S5I      | 1.0             | 0.1 | 0.8  | 0.2  | 6.8  |
| (SaHHn) <sub>2</sub> -Aβ(-57-15)                                    | 9280.2303  | N        | 1.0             | 0.3 | 0.9  | 0.2  | 6.4  |
| Sa <sub>2</sub> HHnSaHHn-Aβ(-57-15)                                 | 9571.3258  | N        | 1.0             | 0.2 | 0.8  | 0.1  | 5.8  |
| (SaHHn) <sub>3</sub> -Aβ(-57-15)                                    | 9936.4580  | F4D      | 1.0             | 0.1 | 0.7  | 0.1  | 6.9  |
| Sa <sub>2</sub> HHn(SaHHn) <sub>2</sub> -Aβ(-57-15)                 | 10227.5534 | N        | 1.0             | 0.2 | 0.8  | 0.1  | 6.5  |
| (SaHHn) <sub>4</sub> -Aβ(-57-15)                                    | 10592.6856 | S5J      | 1.0             | 0.3 | 0.6  | 0.2  | 6.9  |
| Sa <sub>2</sub> HHn(SaHHn) <sub>3</sub> -Aβ(-57-15)                 | 10883.7810 | N        | 1.0             | 0.3 | 0.7  | 0.2  | 6.6  |
| (Sa <sub>2</sub> HHn) <sub>2</sub> (SaHHn) <sub>2</sub> -Aβ(-57-15) | 11174.8764 | N        | 1.0             | 0.5 | 0.5  | 0.3  | 5.6  |
| (SaHHn) <sub>5</sub> -Aβ(-57-15)                                    | 11248.9132 | N        | 1.0             | 0.2 | 75.7 | 40.0 | 6.2  |

|                                                                     |            |     |     |     |      |      |     |
|---------------------------------------------------------------------|------------|-----|-----|-----|------|------|-----|
| Sa <sub>2</sub> HHn(SaHHn) <sub>4</sub> -Aβ(-57-15)                 | 11540.0086 | N   | 1.0 | 0.3 | 0.9  | 0.5  | 4.8 |
| Aβ(-58-15)                                                          | 8054.8072  | Y   | 1.0 | 0.2 | 1.2  | 0.1  | 6.7 |
| Aβ(-63-15)                                                          | 8601.0510  | N   | 1.0 | 0.1 | 1.0  | 0.1  | 6.4 |
| SaHHn-Aβ(-63-15)                                                    | 9257.2786  | N   | 1.0 | 0.3 | 1.0  | 0.3  | 6.7 |
| Sa <sub>2</sub> HHn-Aβ(-63-15)                                      | 9548.3741  | N   | 1.0 | 0.5 | 1.3  | 0.6  | 6.2 |
| (SaHHn) <sub>2</sub> -Aβ(-63-15)                                    | 9913.5062  | N   | 1.0 | 0.6 | 36.2 | 17.5 | 6.3 |
| Sa <sub>2</sub> HHnSaHHn-Aβ(-63-15)                                 | 10204.6017 | N   | 1.0 | 0.3 | 0.9  | 0.1  | 5.9 |
| (SaHHn) <sub>3</sub> -Aβ(-63-15)                                    | 10569.7339 | S5K | 1.0 | 0.1 | 0.7  | 0.1  | 7.0 |
| Sa <sub>2</sub> HHn(SaHHn) <sub>2</sub> -Aβ(-63-15)                 | 10860.8293 | N   | 1.0 | 0.3 | 0.8  | 0.1  | 6.6 |
| (SaHHn) <sub>4</sub> -Aβ(-63-15)                                    | 11225.9615 | S5L | 1.0 | 0.3 | 0.5  | 0.1  | 7.0 |
| Sa <sub>2</sub> HHn(SaHHn) <sub>3</sub> -Aβ(-63-15)                 | 11517.0569 | F4E | 1.0 | 0.4 | 0.9  | 0.2  | 6.8 |
| (Sa <sub>2</sub> HHn) <sub>2</sub> (SaHHn) <sub>2</sub> -Aβ(-63-15) | 11808.1523 | N   | 1.0 | 0.3 | 1.0  | 0.4  | 6.1 |
| (SaHHn) <sub>5</sub> -Aβ(-63-15)                                    | 11882.1891 | N   | 1.0 | 0.4 | 0.4  | 0.3  | 6.0 |
| Sa <sub>2</sub> HHn(SaHHn) <sub>4</sub> -Aβ(-63-15)                 | 12173.2845 | N   | 1.0 | 0.3 | 0.8  | 0.2  | 5.7 |

<sup>a</sup> Sa = Neu5Ac, H = Hex, Hn = HexNAc, LaSa<sub>2</sub> = two Neu5Ac linked with lactone formation, Ac = O-acetyl

<sup>b</sup> Y = CID MS<sup>2</sup> data obtained but not shown in this publication; N = MS<sup>2</sup> data not obtained; F# = MS<sup>2</sup> data obtained and shown in Fig. #; S# = MS<sup>2</sup> data obtained and shown in Fig. S#

<sup>c</sup> Values obtained as described in the *Materials and Methods* section. Below threshold = no signal detected in the AD vs. non-AD study, but detected in other experiments.

<sup>d</sup> log<sub>10</sub> values of mean peak intensity of the 13 spectra used in the quantitative AD vs. non-AD study. Signal threshold was subjectively set to 1000 (log<sub>10</sub>1000 = 3). Peptides with log<sub>10</sub> peak intensity <3.0 in this set were thus below the detection threshold.

**Table S2.** Sequence and structures of APP/Aβ glycopeptides obtained after sialic acid capture-and-release of peptides immunopurified from CSF with the 6E10 antibody. CID MS<sup>2</sup> spectra of these glycopeptides are shown in **Figs. S7 and S8**.

| Peptide              | APP/Aβ region | Glycan                   | Mascot score | Threshold (p<0.05) |
|----------------------|---------------|--------------------------|--------------|--------------------|
| K.TEEISEVK.M         | -9-(-2)       | HexHexNAc                | 34           | >25                |
| K.TEEISEVKMDAEFR.H   | -9 - 5        | HexHexNAc                | 62           | >21                |
| R.GLTRPGSGLTNIK.T    | -23-(-10)     | (HexHexNAc) <sub>3</sub> | -            | -                  |
| R.GLTRPGSGLTNIK.T    | -23-(-10)     | (HexHexNAc) <sub>2</sub> | 19           | >18                |
| R.GLTRPGSGLTNIK.T    | -23-(-10)     | HexHexNAc                | 39           | >19                |
| D.SVPANTENEVEPVDAR.P | -44-(-29)     | HexHexNAc                | 43           | >25                |
